# 1 Incomplete protection against dengue virus type 2 re-infection in Peru

2 Brett M. Forshey, PhD<sup>1\*#</sup>, Robert C. Reiner, PhD<sup>2,3</sup>, Sandra Oikowski, BS<sup>4</sup>, Amy C. Morrison,  
3 PhD<sup>1,4</sup>, Angelica Espinoza, BS<sup>1</sup>, Kanya C. Long, PhD<sup>4,5</sup>, Stalin Vilcarrromero, MD<sup>1</sup>, Wilma  
4 Casanova, MD<sup>6,7</sup>, Helen J. Wearing, PhD<sup>8</sup>, Eric S. Halsey, MD<sup>1</sup>, Tadeusz J. Kochel, PhD<sup>1</sup>,  
5 Thomas W. Scott, PhD<sup>3,4</sup>, and Steven T. Stoddard, PhD<sup>3,4</sup>

6 1 U.S. Naval Medical Research Unit No. 6, Lima and Iquitos, Perú;

7 2 Indiana University School of Public Health, Bloomington, IN, USA

8 3 Fogarty International Center, National Institutes of Health, Bethesda, Maryland, USA

9 4 Department of Entomology and Nematology, University of California, Davis, California, USA

10 5 Department of Biology, Andrews University, Berrien Springs, Michigan, USA

11 6 Universidad Nacional de la Amazonía Peruana, Iquitos, Perú

12 7 Dirección Regional de Salud Loreto, Iquitos, Perú

13 8 University of New Mexico, Albuquerque, Albuquerque, New Mexico, USA

14 \* Corresponding author. Email: [brett.forshey@gmail.com](mailto:brett.forshey@gmail.com)

15 # Current address: Armed Forces Health Surveillance Center, Silver Spring, MD 20904

16

17 **Running title:** DENV-2 re-infection in Peru

18 **Keywords:** dengue, epidemiology, cohort, virus neutralization, antibody, immunity, arbovirus

19

20 **Background.** Nearly half of the world's population is at risk for dengue, yet no licensed vaccine  
21 or anti-viral drug is currently available. Dengue is caused by any of four dengue virus serotypes  
22 (DENV-1 through DENV-4), and infection by a DENV serotype is assumed to provide life-long  
23 protection against re-infection by that serotype. We investigated the validity of this fundamental  
24 assumption during a large dengue epidemic caused by DENV-2 in Iquitos, Peru, in 2010-2011,  
25 15 years after the first outbreak of DENV-2 in the region.

26 **Methodology/Principal Findings.** We estimated the age-dependent prevalence of serotype-  
27 specific DENV antibodies from longitudinal cohort studies conducted between 1993 and 2010.  
28 During the 2010-2011 epidemic, active dengue cases were identified through active community-  
29 and clinic-based febrile surveillance studies, and acute inapparent DENV infections were  
30 identified through contact tracing studies. Based on the age-specific prevalence of DENV-2  
31 neutralizing antibodies, the age distribution of DENV-2 cases was markedly older than expected.  
32 Homologous protection was estimated at 35.1% (95% confidence interval: 0% -- 65.2%). At the  
33 individual level, pre-existing DENV-2 antibodies were associated with an incomplete reduction  
34 in the frequency of symptoms. Among dengue cases, 43% (26/66) exhibited elevated DENV-2  
35 neutralizing antibody titers for years prior to infection, compared with 76% (13/17) of inapparent  
36 infections (age-adjusted odds ratio: 4.2; 95% confidence interval: 1.1 – 17.7).

37 **Conclusions/Significance.** Our data indicate that protection from homologous DENV re-  
38 infection may be incomplete in some circumstances, which provides context for the limited  
39 vaccine efficacy against DENV-2 in recent trials. Further studies are warranted to confirm this  
40 phenomenon and to evaluate the potential role of incomplete homologous protection in DENV  
41 transmission dynamics.

42

43 **Author Summary**

44 Homotypic immunity against DENV infection has been assumed to be complete and lifelong,  
45 and to our knowledge, instances of homologous DENV re-infection have not been rigorously  
46 documented. However, few long-term studies have been conducted in such a way that  
47 homologous re-infection could be observed, if it did in fact occur. Our study provides evidence  
48 that homologous re-infection may occur in certain circumstances. We draw from data collected  
49 during a 2010-2011 DENV-2 epidemic in northeastern Peru, 15 years after the initial DENV-2  
50 outbreak in the region. This finding has significant implications for our understanding of dengue  
51 epidemiology and for dengue vaccine formulation, which may need to consider multiple  
52 genotypes of each serotype. Data from other long-term dengue epidemiology studies should be  
53 analyzed to determine if homologous re-infection is a more widespread phenomenon.

54

55

## 56 **Introduction**

57           Dengue is a mosquito-borne viral illness that imposes a tremendous public health burden  
58 on tropical and sub-tropical regions. An estimated 390 million infections occur globally each  
59 year, and up to 4 billion people are at risk [1]. Dengue is caused by four dengue virus (DENV)  
60 serotypes (DENV-1 to DENV-4). Infection with any DENV can lead to a range of disease  
61 outcomes, from mild febrile illness to severe, hemorrhagic manifestations and death. Although  
62 DENV infections are often inapparent, many dengue cases require hospitalization, which can  
63 overwhelm medical infrastructure during epidemics. There are no specific antiviral therapeutics  
64 and currently no licensed vaccine.

65           DENVs display substantial inter-serotypic genetic heterogeneity. Serotypes share less  
66 than 70% identity at the nucleotide level and less than 80% identity at the amino acid level [2],  
67 similar to the genetic distance between Japanese encephalitis virus and West Nile virus.  
68 Infection by one DENV serotype appears to induce relatively short term protection against  
69 infection by a heterologous serotype [3,4]. Thereafter, an individual returns to being susceptible  
70 to heterologous infection [5,6]. Importantly, an individual's specific DENV infection history can  
71 either enhance or attenuate the severity of disease they experience during subsequent, sequential  
72 exposures [7–9].

73           Although DENVs are genetically and phenotypically diverse within serotypes, infection  
74 with one strain of a serotype is thought to induce lifelong protection against infection by all other  
75 strains of the homologous serotype [10]. This assumption, however, lacks direct support, in part  
76 because of difficulty in obtaining the appropriate epidemiological data and the absence of an  
77 adequate animal model for studying DENV pathogenesis. In neutralization assays, serum and

78 monoclonal antibody titers can vary markedly depending on the viral strain used [11], which  
79 suggests that intra-serotype variability could be epidemiologically important. If re-infection with  
80 a new strain of a homologous DENV serotype can produce symptomatic disease, even if  
81 tempered by imperfect neutralization, this would have significant ramifications for the ongoing  
82 development of DENV vaccines [12] and our understanding of DENV transmission dynamics.

83         Between late 2010 and early 2011, Iquitos, Peru, experienced an unprecedented outbreak  
84 of severe dengue caused predominantly by an American/Asian genotype of DENV-2 (AA-  
85 DENV-2) [13,14]. The number of cases (~25,000) reported by the local health authorities [15]  
86 far exceeded any previous epidemic in Iquitos, with greater than 2,500 cases per week reported  
87 on several occasions. Many cases required hospitalization, which overwhelmed the local health  
88 care system [16]. This epidemic occurred 15 years after DENV-2 (American genotype; Am-  
89 DENV-2) was first detected in Iquitos, which caused a large outbreak of febrile illness starting in  
90 1995. In the intervening years between the two outbreaks, few isolates of DENV-2 were detected  
91 in Iquitos [17]. The 1995 introduction of Am-DENV-2 caused a large outbreak of febrile illness  
92 and led to a high prevalence of DENV-2 antibodies among Iquitos residents [18,19]. Given the  
93 high DENV-2 antibody prevalence and the sheer magnitude of the dengue outbreak, we  
94 postulated that the pre-existing antibodies failed to protect against reinfection and disease. We  
95 tested this hypothesis by analyzing population- and individual-level infection patterns, utilizing  
96 data from ongoing clinic- and community-based febrile surveillance and a long-term series of  
97 longitudinal studies on the seroprevalence of DENV in Iquitos.

98

99

## 100 **Methods**

101 Ethical considerations. All human subjects protocols (see [20] for protocol numbers) were in  
102 compliance with all applicable US Federal regulations governing the protections of human  
103 subjects. All protocols received approval from the institutional review boards of all participating  
104 institutions. In addition, protocols were reviewed and approved by the Loreto Regional Health  
105 Department, which oversees health-related research in Iquitos. Written consent was provided by  
106 adult study participants or by parents or guardians of participating minors.

107 Prospective longitudinal cohorts. Samples used for estimating serotype-specific antibody  
108 prevalence between 1993 and 2010 were collected from five different longitudinal cohort studies  
109 [20]. Cohort participation was restricted to participants above the age of 5; four of the cohorts  
110 included adult participants above the age of 17. Serum samples were collected at 6 to 12 month  
111 intervals and were tested for DENV neutralizing antibodies by the plaque reduction  
112 neutralization test (PRNT). In the first study (the source data for years 1993 (n=283), 1994  
113 (n=195), 1995 (n=162), and 1996 (n=333)), yearly serum samples were collected from school-  
114 aged children (5 – 22 years) who attended six schools in Iquitos [18]. The second cohort (under  
115 the study name “Entomological Correlates of Dengue Control”; the source data for years 1999  
116 (n=1,444) and 2002 (n=2,055), and part of the source data for 2004 (combined n=3,068)) was  
117 initiated in 1999, continued through 2005 [19], and included a geographically stratified sample  
118 of approximately 2,400 participants (school age children and their family members). After the  
119 base cohort was established, follow-up samples were collected at approximately 6-month  
120 intervals. The third cohort (study name “Dengue Vector Control System”; part of the source data  
121 for 2004 (combined n=3,068)) was initiated in 2004, with 2,415 participants providing a baseline

122 serum sample [19]. Follow-up serum samples were collected in January—February 2005 and  
123 October 2005. The fourth cohort (study name “Active Dengue Surveillance and Predictors of  
124 Disease Severity in Iquitos, Peru”; the source data for 2006 (n=2,356), and part of the source  
125 data for years 2008 (combined n=2,137) and 2010 (combined n=3,131)) was initiated in 2006,  
126 and included approximately 2,400 participants at baseline. Samples were collected  
127 approximately every six months until mid-2010. The final cohort (“Measuring Entomological  
128 Risk for Dengue”; part of the source data for years 2008 (combined n=2,137) and 2010  
129 (combined n=3,131)) was initiated in late 2007 among approximately 2,400 participants [21] and  
130 is ongoing. Individuals above the age of five years residing in study neighborhoods were invited  
131 to participate. Longitudinal serum samples were provided between 6 and 12 month intervals  
132 [20]. Seroprevalence estimates presented in this manuscript are based on laboratory analysis and  
133 data generated at the time of each study.

134 **Virus neutralization assays.** PRNTs with a semi-solid overlay were used to quantify serotype-  
135 specific neutralizing antibodies, as previously described [8]. Samples that reduced the number of  
136 plaques by 70% (i.e. PRNT70) relative to normal human serum at a serotype-specific cutoff  
137 dilution were considered positive. Cut-off dilutions were set at 1:60 for DENV-1, DENV-2, and  
138 DENV-3, and 1:40 for DENV-4 (all after the addition of virus). Positive and negative control  
139 human sera were included with each set of samples analyzed. For routine seroprevalence studies  
140 conducted in prior to 2005, positivity (e.g., 70% reduction at 1:60 dilution) was based on  
141 samples tested at 1:60 dilution (after the addition of virus). For routine seroprevalence studies  
142 conducted after 2005, positivity (e.g., 70% reduction at 1:60 dilution) was based on titers were  
143 estimated by probit regression, using a dilution series of 1:40, 1:80, 1:160, and 1:640, after the

144 addition of virus. For quantifying end point titers, samples were diluted four-fold from 1:40 to  
145 1:10240 and tested in duplicate; final titers were estimated by probit regression.

146 For seroprevalence studies, test viruses were DENV-1 16007 (DHF case from Thailand,  
147 1964), DENV-2 16681 (Asian I genotype; DHF case from Thailand, 1964), DENV-3 IQD1728  
148 (DF case from Peru, 2002), and DENV-4 1036 (DF case from Indonesia, 1976). DENV-2 16681  
149 (Asian genotype) was selected for the seroprevalence assays because previous experiments in our  
150 laboratory showed that this strain minimized a cross-reactive response from DENV-1 infection  
151 [9]. For comparing antibody titers against Am-DENV-2 and AA-DENV-2 genotypes, viral  
152 strains were IQT2124 (American genotype, Iquitos, 1995), IQT2913 (American genotype,  
153 Iquitos, 1996), NFI1159 (American/Asian genotype, Iquitos 2010), and NFI1166  
154 (American/Asian genotype, Iquitos, 2010).

155 Febrile surveillance. Clinic-based surveillance was conducted as described previously [17].  
156 Briefly, participants 5 years of age or older were enrolled when reporting to outpatient clinics or  
157 hospitals in Iquitos within 7 days of onset of symptoms (fever, plus one or more other symptoms,  
158 such as headache, muscle pain, or retro-orbital pain). Within longitudinal cohorts underway  
159 during the 2010-2011 epidemic, dengue cases were identified through a community-based door-  
160 to-door active surveillance [8]. Participants' homes were visited three times per week by  
161 technicians to inquire about residents with acute febrile illness. For both clinic-based and  
162 community-based surveillance, acute-phase serum samples were collected at time of presentation  
163 and convalescent-phase serum samples were collected two weeks to a month later. Confirmed  
164 dengue cases were defined as positive by immunofluorescence assay (IFA) in tissue culture, by  
165 reverse transcriptase polymerase chain reaction (RT-PCR), or IgM ELISA, as previously

166 described [17]. Based on clinic-based febrile surveillance, 84% (n=433) of all DENV isolates  
167 during the 2010-2011 epidemic were DENV-2, 13% (n=69) were DENV-4 and 3% (n=13) were  
168 DENV-1.

169 **Contact tracing studies.** Contact tracing studies were ongoing during the 2010-2011 epidemic  
170 as part of a project aiming to capture inapparent infections and to measure the importance of  
171 human movement patterns in dengue virus transmission [21]. Upon identification of a DENV-  
172 positive febrile case through active, community-based surveillance, a cluster investigation was  
173 initiated. Participation was then solicited from all individuals living in houses recently visited by  
174 the DENV case and in neighboring households. All participants provided blood samples at days  
175 0 and 15 to test for DENV infection by RT-PCR. Individuals participating in the cluster  
176 investigations were monitored for manifestations of febrile illness.

177 **Expected and observed age distributions of DENV-2 cases.** The age distribution of clinical  
178 cases is determined by the age structure of the population and at least three key epidemiological  
179 processes: immunity, the force of infection (risk of exposure) and the development of clinical  
180 symptoms. Given age-specific profiles for each of these and the age structure of the population,  
181 the expected age distribution of cases can be inferred. If we consider the scenario of a novel  
182 pathogen invading a completely susceptible population with no age dependence in risk of  
183 exposure or manifestation of disease, then the age distribution of cases would mirror the age  
184 distribution of the population. By contrast, the re-introduction of an immunizing pathogen should  
185 result in a shift of cases to lower age groups who have no prior exposure and, therefore, no  
186 protection. We would expect this shift would be less marked, however, if immunity were  
187 imperfect.



188 To compare the observed age distribution of DENV-2 cases in clinics and hospitals to the  
189 age distribution we computed an expected age distribution of cases based on: (1) the total  
190 number of observed cases (say  $N$ ), (2) the age distribution of individuals who appeared at the  
191 clinics and hospitals with a febrile illness[17] and participated in the febrile surveillance studies  
192 in past years, and (3) age-based distribution of DENV-2 neutralizing antibodies in the months  
193 preceding the epidemic. From (2) and (3) we computed the expected probability that the next  
194 case that appears in the clinics with DENV-2 will be of a particular age (for each age group).  
195 Specifically, for each age group, we found from (2) what percent of that age group is still  
196 susceptible to DENV-2 (say, for age group  $i$ ,  $p_i$ ) and from (3) we found what percent of those  
197 who appeared at a clinic or hospital were from that age group (say, for age group  $i$ ,  $a_i$ ). Letting  $q_i$   
198 be the probability that the next DENV-2 case that appears at a clinic or hospital is of age group  $i$ ,  
199 we have:

$$200 \quad q_i = \frac{p_i a_i}{\sum_j p_j a_j}$$

201 This equation is based on the assumption that an individual of any age is equally likely to  
202 become infected. By multiplying these probabilities by the total number of DENV-2 cases  
203 identified at the clinics and hospitals, we arrive at the expected number of cases by age that  
204 would have been expected if the patterns of age at time of infection were identical during the  
205 epidemic as compared with before the epidemic (specifically, for age group  $i$ ,  $q_i \times N$ ).

206 We further investigated the possibility of incomplete homologous protection against  
207 symptomatic infection by adjusting the age-based distribution of DENV-2 neutralizing  
208 antibodies (3). Above we assumed that the presence of neutralizing antibodies conferred  
209 immunity, and that only those without these antibodies could become symptomatically infected

210 in the future. To investigate imperfect immunity, we assumed that the percentage of the  
211 individuals with neutralizing antibodies did not directly translate into the percentage of  
212 individuals who were immune. Letting  $\gamma$  be the percent of those who have protective antibodies,  
213 we recomputed  $q_i$  as:

$$214 \quad q_i = \frac{(\gamma * p_i + 1 - \gamma)a_i}{\sum_j (\gamma * p_j + 1 - \gamma)a_j}$$

215 We then vary  $\gamma$  from 0 (corresponding to zero protection) to 1 (corresponding to complete  
216 protection from disease resulting from infection).

217 For each value of  $\gamma$ , we calculate a distribution of cases by age. We can then compare  
218 this “expected” distribution with the “observed” distribution of cases at the clinics. By  
219 calculating the probability of observing a deviation from the expected distribution as large as or  
220 larger than the one observed, we can identify which values of  $\gamma$  would not result us in concluding  
221 that there is a statistically significant difference between the expected and observed distributions.  
222 Exploiting the duality between hypothesis tests and confidence intervals, and using a cutoff of  
223 5% for the above probability for each value of  $\gamma$ , we create a 95% confidence interval. The value  
224 of  $\gamma$  that maximizes this probability we use as our point estimate of the value of  $\gamma$  that is most  
225 supported by the data and the model. For formal comparisons, we utilize the likelihood ratio test  
226 for contingency tables (also known as the G test). For illustrative purposes, we also include  
227 analysis for the simpler Chi-square test.

## 228 **RESULTS**

### 229 **The 2010-2011 DENV-2 outbreak**

230 Based on two cohort studies that together sampled people (n=3127) in neighborhoods  
231 located throughout the city [8,20,21], in early 2010 the prevalence of neutralizing antibodies

232 among Iquitos residents was approximately 82.1% (95% CI 80.7% -- 83.4%) for DENV-1,  
233 74.5% (95% CI 73.0% -- 76.1%) for DENV-2, 67.1% (65.4% -- 68.7%) for DENV-3, and 40.7%  
234 (95% CI 38.9% -- 42.4%) for DENV-4 (Figure 1A), reflecting the order of DENV invasions  
235 since 1990 [17,20]. The seroprevalence of DENV-1 and DENV-2 neutralizing antibodies was  
236 strongly age-dependent (Figure 1A), as was the prevalence of multitypic neutralization profiles  
237 (neutralizing antibodies against two or more serotypes; Figure 1B). In contrast, the prevalence of  
238 DENV-3 and DENV-4 neutralizing antibodies was less age-dependent, consistent with the  
239 history of dengue outbreaks in Iquitos. The age-specific DENV-2 seroprevalence, spiking  
240 between the 10-14 and 15-19 year old age groups (Figure 1A), and analysis of cohort studies  
241 dating back to 1993 [18] strongly suggest that these titers were due to prior exposure during an  
242 Am-DENV-2 outbreak starting in 1995 rather than cross-reactive antibody for heterologous  
243 DENV serotypes.

244         Given that the observed DENV-2 antibody prevalence in the Iquitos population was  
245 primarily the result of prior exposure to Am-DENV-2 ten years earlier and the sheer magnitude  
246 of the 2010-2011 dengue outbreak, we postulated that the pre-existing antibodies failed to protect  
247 against reinfection and disease. Although we did not detect any individuals with virologically-  
248 confirmed acute DENV-2 infections in both 1995 and 2010-2011, likely because of limitations of  
249 febrile surveillance activities in the mid-1990s and challenges in linking participant results across  
250 studies, we were able to test this hypothesis by analyzing population and individual level  
251 infection patterns.

252

253

## 254 **Population-level infection patterns**

255           Age-dependent patterns of infection and disease in a population are in part a reflection of  
256 the extent of pre-existing immunity [22]. Given the high prevalence of DENV-2-neutralizing  
257 antibodies in 2010 among individuals older than 15 years (86.9%; 95% CI: 85.5% -- 88.2%;  
258 Figure 1A), we expected most new cases to occur in children. We therefore compared the  
259 observed age distribution of new AA-DENV-2 cases identified through clinic-based surveillance  
260 systems [17] with an expected distribution, based on the age-specific prevalence of DENV-2  
261 neutralizing antibodies prior to the epidemic and the age distribution of febrile cases that  
262 participated in previous years of the studies. The observed distribution included many more cases  
263 in older age groups, especially 20 – 40 year-olds, than was expected given the age distribution of  
264 DENV-2 neutralizing antibodies prior to the introduction of AA-DENV-2 (Figure 2A). For  
265 comparison, we conducted the same analysis for DENV-4 transmission during the same time  
266 period between 2010 and 2011. For DENV-4, first introduced in 2008 and, therefore, with a  
267 much more recent history in Iquitos, the age distribution of dengue cases was consistent with  
268 what would be predicted based on age structure and detected immunity levels in the population  
269 (Figure 2B). We subsequently generated expected distributions of AA-DENV-2 infections  
270 assuming several levels of partial immunity conveyed by the pre-existing DENV-2 antibodies.  
271 We found that we could reproduce the observed distribution of DENV-2 cases when protection  
272 was incomplete (Figure 2C and 2D), with an estimated homologous protection of 35.1% (95%  
273 CI: 0% -- 65.2%) providing a best fit with the observed data.

274           The observed distribution of AA-DENV-2 cases could have been influenced by age-  
275 specific differences in infection rates. We addressed this concern using data from a case-control  
276 contact-tracing study [21] that captured inapparent DENV-2 infections and DENV-negative

277 individuals concurrently. We compared the age-distribution of infected and uninfected  
278 individuals (Figure 3) and found them to be very similar (DENV-2 infections: mean age 31.4  
279 years, standard deviation 19.3 years, n=75; DENV-negative: mean age 28.5 years, standard  
280 deviation 18.0 years, n=2333).

281 To address the possibility that the observed DENV-2 neutralizing antibodies were the  
282 result of cross-reaction from heterologous DENV infection, we utilized multiple cross-sectional  
283 samples from cohort studies conducted in Iquitos since the early 1990s [8,18,19,23]. If cross-  
284 reaction was driving the observed age dependence of DENV-2 neutralizing antibodies, we would  
285 expect that the DENV-2 antibody prevalence in adults to have increased incrementally over the  
286 years, including during periods such as 2001 – 2010 that were dominated by transmission of  
287 heterologous serotypes and near absence of confirmed clinical DENV-2 infections. Yet, among  
288 individuals born prior to 1995, the observed pattern was consistent with DENV-2 neutralizing  
289 antibodies generated largely during the 1995 outbreak (Figure 4).

290 In 1993, following the DENV-1 epidemic and prior to the known emergence of DENV-2,  
291 most of the population had DENV-1 antibodies (Figure 4A), yet fewer than 10% had DENV-2  
292 antibodies (Figure 4B; see also [18]). Even the few DENV-2 antibodies observed prior to 1995  
293 were likely short-term cross-reactive (heterotypic) antibodies from recent DENV-1 infection,  
294 because the majority were in DENV-1 positive individuals, and only 32% of DENV-2 antibody  
295 positive individuals maintained neutralizing antibodies during the next sampling season (i.e.,  
296 from 1993 to 1994). DENV-2 antibody prevalence spiked following the 1995 DENV-2  
297 epidemic and was largely stable among individuals born prior to 1990 (i.e., those alive during the  
298 entirety of contemporary DENV transmission in Iquitos) from 1995 to 2010 (i.e., immediately

299 preceding the second DENV-2 epidemic; Figure 4B). For participants born after 1999 (i.e.,  
300 following the first period of DENV-2 circulation), DENV-2 antibody prevalence remained low  
301 until 2010, despite experiencing more than a decade of DENV transmission (predominantly  
302 DENV-3 and DENV-4). These data indicate that DENV-2 antibodies observed in adults prior to  
303 the 2010-2011 epidemic were predominantly due to true DENV-2 infection (specifically, Am-  
304 DENV-2).

### 305 **Individual-level infection patterns**

306 The results from the population-level analysis indicate that some individuals with pre-  
307 existing DENV-2 neutralizing antibodies prior to the 2010 epidemic were infected by AA-  
308 DENV-2 and presented with clinically apparent disease. To address this possibility, we examined  
309 the serological histories (see Methods) of individuals who had symptomatic or clinically  
310 inapparent AA-DENV-2 infections (Table 1) and who had provided two or more samples  
311 (median 4 samples; range, 2 – 7 samples) in a longitudinal cohort study. Among AA-DENV-2  
312 cases, 43% (26/66) had consistently robust DENV-2 neutralizing titers (i.e., titers >60 for all pre-  
313 infection samples; geometric mean titer, 267) prior to the symptomatic AA-DENV-2 infection.  
314 There was a strong age dependence, consistent with the history of DENV circulation in Iquitos.  
315 Among cases born prior to 1995, 61% had DENV-2 neutralizing antibodies prior to infection,  
316 compared with 17% among those born during 1995 or later (Table 1). Among the clinically  
317 inapparent AA-DENV-2 infections, 76% (13/17) had DENV-2 neutralizing antibodies prior to  
318 infection, a prevalence similar to the study population at-large (73%) but higher than the  
319 symptomatic infections (i.e., 43%; age-adjusted odds ratio 4.2, 95% confidence interval 1.1 –  
320 17.7). Among these AA-DENV-2-infected individuals (symptomatic and inapparent), the  
321 proportion with pre-existing DENV-2 neutralizing antibodies was consistent for years leading up

322 to the 2010-2011 epidemic, as was the magnitude of antibody titers (Table 2). Three individuals  
323 that were monotypic for DENV-2 at the start of the study experienced virologically-confirmed  
324 acute DENV-2 infections during the 2010-2011 epidemic; two were inapparent and one was  
325 clinically apparent. These data suggest that AA-DENV-2 did infect individuals with pre-existing  
326 high titer DENV-2-neutralizing antibodies and are consistent with the notion that DENV-2  
327 antibodies provided partial protection against disease.

328         Our results suggest the possibility that Am-DENV-2 infection failed to generate  
329 antibodies that robustly neutralize AA-DENV-2. To address this, we utilized pre-epidemic  
330 serum collected between 2006 and 2010 from individuals who were later detected with AA-  
331 DENV-2 infections (n=21) and compared end point titers against two strains of Am-DENV-2  
332 and two strains of AA-DENV-2 (Table 3). Robust neutralizing titers were observed against both  
333 genotypes, although pre-epidemic titers were two-fold higher against Am-DENV-2 strains  
334 (mean, 363) compared with AA-DENV-2 strains (mean, 171). In contrast, post-epidemic serum  
335 (2011-2012) collected from previously DENV-2-naïve individuals who were infected during the  
336 2010-2011 epidemic (n=14) did not have higher titers using Am-DENV-2 test viruses (mean,  
337 739) compared with AA-DENV-2 (mean, 899; Table 3).

## 338 **Discussion**

339         We provide indirect evidence that challenges a fundamental assumption of dengue  
340 immunology: that infection with one serotype conveys lifelong protection to reinfection by all  
341 strains belonging to the same serotype. A newly introduced genotype of DENV-2 exhibited  
342 characteristics similar to a novel serotype in a population with a high prevalence of DENV-2  
343 neutralizing antibodies. Moreover, we isolated DENV-2 virus from numerous individuals with

344 pre-existing, robust DENV-2 antibody titers. Epidemiological data from long-term longitudinal  
345 cohort studies[20] show that pre-existing DENV-2 antibodies present in the adult population  
346 were mostly a product of the invasion of an American strain of DENV-2 in 1995. Although these  
347 antibodies did not appear to completely protect against infection with the new strain, they did  
348 appear to provide partial protection against febrile illness, reducing the probability of disease.  
349 Dengue epidemiology and vaccine development have long been complicated by the  
350 immunological interplay among serotypes at the level of the human host. Genetic and phenotypic  
351 heterogeneity may be sufficient to extend this interplay to the level of individual genotypes,  
352 which markedly increases the complexity of the system[7] and could present further challenges  
353 for the development of a suitable dengue vaccine[12,24].

354         One key piece of evidence in our study arises from the observation of more infections  
355 than expected in older age groups. Our calculations for the expected age distribution of DENV-2  
356 cases take into account the age-dependent participation in our febrile illness studies. Our  
357 previous analysis of DENV-3 and DENV-4 seroconversions did not indicate an substantial age-  
358 dependent risk for infection [8]. Further, among confirmed infections, we did not observe a  
359 marked age-dependent difference in risk for disease for DENV-3, and we observed only a  
360 modest increase in disease risk among younger adults for DENV-4 [8]. Although others have  
361 reported that disease risk may increase with age [25], this conclusion is based on indirectly  
362 measured exposures and could be skewed by reporting biases. Additionally, in Iquitos, the large  
363 majority of individuals older than 20 years (~90%; Figure 1B) have been exposed to at least two  
364 serotypes, which would be expected to dramatically reduce the risk of disease upon infection  
365 relative to younger participants [8]. Therefore, we feel that our assumptions are conservative and  
366 likely underestimate the relative number of cases among older participants.



367 Our results depend in part on PRNTs, which are widely considered the most specific  
368 serological tests available for DENV. Yet even PRNTs can be prone to cross-reaction in some  
369 circumstances [26]. To reduce potential for cross-reaction, we used more stringent conditions  
370 (PRNT70 at 1:60 dilution cutoff) than used in most dengue vaccine [12] or dengue  
371 epidemiological studies [27], which often use a 50% reduction (PRNT50) threshold. We  
372 conducted an additional evaluation of even more stringent conditions (90% reduction threshold,  
373 or PRNT90) had only modest reductions in seroprevalence (67% for PRNT90 at a 1:60 dilution  
374 cutoff versus 73% for PRNT70 as reported above). Furthermore, among individuals who had  
375 pre-existing DENV-2 neutralizing antibodies and were infected during the 2010-2011 epidemic,  
376 more than half had titers greater than 300 (using 70% reduction threshold). This titer (323, using  
377 the lower 50% reduction threshold) was proposed as a cutoff for differentiating “susceptible”  
378 from “non-susceptible” subjects based on limited data from a Thai cohort [28].

379 More importantly, we directly address the issue of cross-reaction by utilizing samples  
380 collected prior to the first documented DENV-2 outbreak in 1995. Detectable DENV-2 antibody  
381 prevalence was low prior to DENV-2 emergence in Iquitos, spiked immediately following  
382 DENV-2 emergence in 1995, and remained stable among adults up to the 2010-2011 epidemic  
383 (Figure 4). Further, the prevalence of antibodies in individuals born after the major DENV-2  
384 transmission period (1995—1999) was low, despite potential for cross-reaction following  
385 epidemics of DENV-3 and DENV-4 between 2001 and 2009. The absence of a large age shift in  
386 overt disease during the AA-DENV-2 epidemic also supports our conclusion. In contrast, the  
387 2007-2008 re-emergence of DENV-2 in Brazil was accompanied by an age shift in dengue cases,  
388 with a sharp increase in disease incidence in younger age groups relative to older individuals

389 [29]. Notably in the case of Brazil, AA-DENV-2 had circulated during earlier outbreaks (before  
390 2002) prior to re-emerging in 2007.

391 It is not clear if the homologous serotype re-infection we identified is unique to the  
392 DENV-2 genotypes we studied (i.e., American genotype followed by American/Asian genotype)  
393 or if it is a more widespread phenomenon among other dengue viruses. Within the E gene  
394 coding region, there is approximately 10% nucleotide divergence and 2% amino acid divergence  
395 between Am-DENV-2 and AA-DENV-2. Am-DENV-2 has been shown to differ from Asian and  
396 American/Asian genotypes phenotypically, including replication in tissue culture and incubation  
397 periods in mosquitoes[30,31]. Further, for other arthropod-borne viruses and influenza viruses, a  
398 few amino acid changes can have profound antigenic and epidemiological consequences [32].  
399 There is some support for re-infection with a homologous DENV serotype in animal and in vitro  
400 studies, although most studies do not utilize naturally occurring virus variants and do not  
401 challenge hosts with a different genotype of a homologous serotype. In vaccine studies in non-  
402 human primates, viremia may be attenuated but detectable despite the presence of a robust  
403 immune response [33]. Even when viremia is undetectable, sufficient viral replication occurs to  
404 stimulate homotypic antibody boosting [10]. In one challenge study, four of five monkeys had  
405 detectable viremia upon challenge with an Asian genotype of DENV-2 following primary  
406 infection by different DENV-2 genotypes [34]. For virus neutralization studies using sera from  
407 vaccinated and naturally infected humans [9,27], monkeys, and mice, there are often marked  
408 genotype-dependent differences in neutralization capacity [11], some greater than 100-fold.  
409 Similarly, monoclonal antibodies vary greatly in their neutralizing activity in cell culture and  
410 protective efficacy in mice [11]. We found quantitative, but not qualitative, differences in  
411 neutralization of Am-DENV-2 compared with AA-DENV-2 (Table 3). Together with our data,

412 these neutralization results support the need to re-evaluate underlying assumptions about the  
413 epidemiological importance of genotypic differences in neutralization capacity [11].

414 To our knowledge, this is the first study to present epidemiological data as evidence for  
415 homologous reinfection by DENV. Numerous other studies have noted a poor correlation  
416 between pre-existing virus neutralization antibody titers and clinical protection, both in natural  
417 infection [27,28] and vaccine trials [12,35]. For example, in a Thai cohort [27], pre-existing  
418 DENV-2 antibodies were detected in 60% of DENV-2 infections. Notably, there was one  
419 DENV-2 case with pre-existing monotypic PRNT pattern for DENV-2, suggestive of re-  
420 infection. In an ongoing clinic-based surveillance system in Puerto Rico, one individual had two  
421 distinct DENV-2 episodes, detected by RT-PCR, 16 months apart [36]. It is possible that  
422 homologous reinfection has occurred in other settings and our awareness of this phenomenon is  
423 limited by study design and diagnostics constrains. For example, genotype replacement events  
424 are not commonly documented in detail [7]. Moreover, unlike our studies in Iquitos, most  
425 community-based cohort studies are short term or monitor only children [7,27], thus it is not  
426 possible to carryout long-term follow-up across different age groups. Most available long-term  
427 dengue datasets include only severe, hospitalized cases, which may not be representative of  
428 actual virus transmission dynamics. However, an analysis of 323 virologically confirmed  
429 sequential infections in Thailand, based largely on 17 years of hospital-based passive  
430 surveillance, did not detect cases of homologous re-infection [37]. Further, homologous  
431 challenge studies in humans conducted in the 1940s by Albert Sabin did not find evidence for re-  
432 infection. The Sabin challenge studies were conducted, however, over a short time frame (< 18  
433 months) with a small sample of participants and utilized the same DENV-2 strain for initial  
434 infection and challenge [3]. In our study we did not detect any individuals with virologically-

435 confirmed acute DENV-2 infections in both 1995 and 2010-2011, likely in large part because of  
436 limitations of febrile surveillance activities in the mid-1990s and challenges in linking participant  
437 samples from across studies and years. Subsequent studies should be designed to track  
438 individuals' DENV infections over longer time periods to confirm our findings and to determine  
439 the relevance of re-infection to DENV transmission dynamics.

440 **Conclusions:** Consistent with other reports [24,27,28], our data demonstrate that the presence of  
441 detectable neutralizing antibodies does not necessarily correlate with protection from a  
442 homologous serotype challenge. Although cross-neutralizing antibodies do arise from  
443 heterologous serotype infection [11], our data indicate that the majority of neutralizing  
444 antibodies were from prior infection and thus our results are consistent with widespread  
445 homologous re-infection by DENV-2. Our results have direct implications for current approaches  
446 for design and development of dengue vaccines. In recent phase 2b and phase 3 trials, a high  
447 proportion of vaccinated individuals developed neutralizing antibodies, with geometric mean  
448 titers exceeding 140 for all serotypes, yet protective efficacy against DENV-2 was far from  
449 complete (<50%) [12,24]. Although viral interference has been suggested as one explanation for  
450 the vaccine failure, our results indicate that success of a vaccine based on a single strain of each  
451 serotype may be dependent on circulating strains. There is an urgent need for better *in vitro*  
452 measures of protection, because positive PRNT results do not accurately predict protection from  
453 symptomatic infection, particularly at the liberal cutoffs used in vaccine immunogenicity studies  
454 (e.g., 50% reduction with 1:10 dilution of serum).

455

456 **Role of funding source.** The funders had no role in study design, data collection and analysis,  
457 decision to publish, or preparation of the manuscript.

458 **Acknowledgements.** We thank the study participants in Iquitos for their time and willingness to  
459 participate. We thank the numerous field and laboratory personnel in Lima and Iquitos,  
460 particularly Carolina Guevara, Zonia Rios, Wieslawa Alava, Rebecca Carrion, Leslye Angulo,  
461 and Guadalupe Flores. Authors Eric S. Halsey and Tadeusz Kochel are military service  
462 members and Angelica Espinoza and Stalin Vilcarromero are employees of the U.S.  
463 Government. This work was prepared as part of their official duties. Title 17 U.S.C. § 105  
464 provides that 'Copyright protection under this title is not available for any work of the United  
465 States Government'. Title 17 U.S.C. § 101 defines a U.S. Government work as a work prepared  
466 by a military service members or employees of the U.S. Government as part of those persons'  
467 official duties. The views expressed in this article are those of the authors and do not necessarily  
468 reflect the official policy or position of the Ministries of Health of Peru or Department of the  
469 Navy, Department of Defense, nor the U.S. Government.

470

471

## 472 **References**

- 473 1. Bhatt S, Gething PW, Brady OJ, Messina JP, Farlow AW, Moyes CL, et al. The global  
474 distribution and burden of dengue. *Nature*. 2013;496: 504–7.
- 475 2. Holmes EC. RNA virus genomics: a world of possibilities. *J Clin Invest*. 2009;119: 2488–  
476 95.
- 477 3. Sabin AB. Research on dengue during World War II. *Am J Trop Med Hyg*. 1952;1: 30–  
478 50.
- 479 4. Reich NG, Shrestha S, King AA, Rohani P, Lessler J, Kalayanarooj S, et al. Interactions  
480 between serotypes of dengue highlight epidemiological impact of cross-immunity. *J R Soc*  
481 *Interface*. 2013;10: 20130414.
- 482 5. Montoya M, Gresh L, Mercado JC, Williams KL, Vargas MJ, Gutierrez G, et al.  
483 Symptomatic versus inapparent outcome in repeat dengue virus infections is influenced by  
484 the time interval between infections and study year. *PLoS Negl Trop Dis*. 2013;7: e2357.
- 485 6. Anderson KB, Gibbons R V, Cummings DAT, Nisalak A, Green S, Libraty DH, et al. A  
486 shorter time interval between first and second dengue infections is associated with  
487 protection from clinical illness in a school-based cohort in Thailand. *J Infect Dis*.  
488 2014;209: 360–8.
- 489 7. OhAinle M, Balmaseda A, Macalalad AR, Tellez Y, Zody MC, Saborio S, et al. Dynamics  
490 of Dengue Disease Severity Determined by the Interplay Between Viral Genetics and  
491 Serotype-Specific Immunity. *Sci Transl Med*. 2011;3: 114ra128–114ra128.
- 492 8. Olkowski S, Forshey BM, Morrison AC, Rocha C, Vilcarromero S, Halsey ES, et al.  
493 Reduced risk of disease during postsecondary dengue virus infections. *J Infect Dis*.  
494 2013;208: 1026–33.
- 495 9. Kochel TJ, Watts DM, Halstead SB, Hayes CG, Espinoza A, Felices V, et al. Effect of  
496 dengue-1 antibodies on American dengue-2 viral infection and dengue haemorrhagic  
497 fever. *Lancet*. 2002;360: 310–312.
- 498 10. Murphy BR, Whitehead SS. Immune response to dengue virus and prospects for a  
499 vaccine. *Annu Rev Immunol*. 2011;29: 587–619.
- 500 11. Wahala WMPB, Silva AM de. The human antibody response to dengue virus infection.  
501 *Viruses*. 2011;3: 2374–95.
- 502 12. Capeding MR, Tran NH, Hadinegoro SRS, Ismail HIHJM, Chotpitayasunondh T, Chua  
503 MN, et al. Clinical efficacy and safety of a novel tetravalent dengue vaccine in healthy

- 504 children in Asia: a phase 3, randomised, observer-masked, placebo-controlled trial.  
505 Lancet. 2014;384: 1358–65.
- 506 13. Williams M, Mayer S V, Johnson WL, Chen R, Volkova E, Vilcarromero S, et al. Lineage  
507 II of Southeast Asian/American DENV-2 is associated with a severe dengue outbreak in  
508 the Peruvian Amazon. *Am J Trop Med Hyg.* 2014;91: 611–20.
- 509 14. Cruz CD, Forshey BM, Juarez DS, Guevara C, Leguia M, Kochel TJ, et al. Molecular  
510 epidemiology of American/Asian genotype DENV-2 in Peru. *Infect Genet Evol.* 2013;18:  
511 220–8.
- 512 15. DIRESA-Loreto. Situación del dengue en Loreto, al 22 de junio del 2011 [Internet]. 2012  
513 [cited 11 Mar 2013].
- 514 16. Durand Velazco S, Fiestas Solórzano V, Sihuincha Maldonado M, Chávez Lencinas C,  
515 Vásquez Vela V, Torrejón Flores C, et al. Impacto de la epidemia de dengue con un nuevo  
516 linaje del DENV-2 Genotipo Americano / Asiático en la demanda de servicios del hospital  
517 de Apoyo de Iquitos “César Garayar García.” *Rev Peru Med Exp Salud Publica.* 2011;28:  
518 157–159.
- 519 17. Forshey BM, Guevara C, Laguna-Torres VA, Cespedes M, Vargas J, Gianella A, et al.  
520 Arboviral etiologies of acute febrile illnesses in Western South America, 2000-2007.  
521 *PLoS Negl Trop Dis.* 2010;4: e787.
- 522 18. Watts DM, Porter KR, Putvatana P, Vasquez B, Calampa C, Hayes CG, et al. Failure of  
523 secondary infection with American genotype dengue 2 to cause dengue haemorrhagic  
524 fever. *Lancet.* 1999;354: 1431–1434.
- 525 19. Morrison AC, Minnick SL, Rocha C, Forshey BM, Stoddard ST, Getis A, et al.  
526 Epidemiology of dengue virus in Iquitos, Peru 1999 to 2005: interepidemic and epidemic  
527 patterns of transmission. *PLoS Negl Trop Dis.* 2010;4: e670–e670.
- 528 20. Reiner RC, Stoddard ST, Forshey BM, King AA, Ellis AM, Lloyd AL, et al. Time-  
529 varying, serotype-specific force of infection of dengue virus. *Proc Natl Acad Sci U S A.*  
530 2014;111: E2694–702.
- 531 21. Stoddard ST, Forshey BM, Morrison AC, Paz-Soldan VA, Vazquez-Prokopec GM, Astete  
532 H, et al. House-to-house human movement drives dengue virus transmission. *Proc Natl*  
533 *Acad Sci U S A.* 2013;110: 994–9.
- 534 22. Anderson RM, May RM. *Infectious Diseases of Humans: Dynamics and Control.* Oxford:  
535 Oxford University Press; 1992. p. 768.

- 536 23. Liebman KA, Stoddard ST, Morrison AC, Rocha C, Minnick S, Sihuincha M, et al.  
537 Spatial dimensions of dengue virus transmission across interepidemic and epidemic  
538 periods in Iquitos, Peru (1999-2003). *PLoS Negl Trop Dis*. 2012;6: e1472.
- 539 24. Sabchareon A, Wallace D, Sirivichayakul C, Limkittikul K, Chanthavanich P,  
540 Suvannadabba S, et al. Protective efficacy of the recombinant, live-attenuated, CYD  
541 tetravalent dengue vaccine in Thai schoolchildren: a randomised, controlled phase 2b trial.  
542 *Lancet*. 2012;6736: 1–9.
- 543 25. Egger JR, Coleman PG. Age and clinical dengue illness. *Emerg Infect Dis*. 2007;13: 924–  
544 5.
- 545 26. Kuno G. Serodiagnosis of flaviviral infections and vaccinations in humans. *Adv Virus*  
546 *Res*. 2003;61: 3–65.
- 547 27. Endy TP, Nisalak A, Chunsuttitwat S, Vaughn DW, Green S, Ennis FA, et al.  
548 Relationship of preexisting dengue virus (DV) neutralizing antibody levels to viremia and  
549 severity of disease in a prospective cohort study of DV infection in Thailand. *J Infect Dis*.  
550 2004;189: 990–1000.
- 551 28. Buddhari D, Aldstadt J, Endy TP, Srikiatkachorn A, Thaisomboonsuk B, Klungthong C,  
552 et al. Dengue virus neutralizing antibody levels associated with protection from infection  
553 in thai cluster studies. *PLoS Negl Trop Dis*. 2014;8: e3230.
- 554 29. Cavalcanti LP. Change in Age Pattern of Persons with Dengue, Northeastern Brazil.  
555 *Emerg Infect Dis*. 2011;17.
- 556 30. Cologna R, Rico-Hesse R. American genotype structures decrease dengue virus output  
557 from human monocytes and dendritic cells. *J Virol*. 2003;77: 3929–38.
- 558 31. Armstrong PM, Rico-Hesse R. Efficiency of dengue serotype 2 virus strains to infect and  
559 disseminate in *Aedes aegypti*. *Am J Trop Med Hyg*. 2003;68: 539–44.
- 560 32. Anishchenko M, Bowen RA, Paessler S, Austgen L, Greene IP, Weaver SC. Venezuelan  
561 encephalitis emergence mediated by a phylogenetically predicted viral mutation. *Proc Natl*  
562 *Acad Sci U S A*. 2006;103: 4994–4999.
- 563 33. Smith KM, Nanda K, Spears CJ, Piper A, Ribeiro M, Quiles M, et al. Testing of novel  
564 dengue virus 2 vaccines in African green monkeys: safety, immunogenicity, and efficacy.  
565 *Am J Trop Med Hyg*. 2012;87: 743–53.
- 566 34. Bernardo L, Izquierdo A, Prado I, Rosario D, Alvarez M, Santana E, et al. Primary and  
567 secondary infections of *Macaca fascicularis* monkeys with Asian and American genotypes  
568 of dengue virus 2. *Clin Vaccine Immunol*. 2008;15: 439–46.



- 569 35. Villar L, Dayan GH, Arredondo-García JL, Rivera DM, Cunha R, Deseda C, et al.  
570 Efficacy of a Tetravalent Dengue Vaccine in Children in Latin America. *N Engl J Med*.  
571 2014; 141103114505002.
- 572 36. Sharp TM, Hunsperger E, Muñoz-Jordán JL, Margolis HS, Tomashek KM. Sequential  
573 episodes of dengue--Puerto Rico, 2005-2010. *Am J Trop Med Hyg*. 2014;91: 235–9.
- 574 37. Bhoomiboonchoo P, Nisalak A, Chansatiporn N, Yoon I-K, Kalayanarooj S,  
575 Thipayamongkolgul M, et al. Sequential dengue virus infections detected in active and  
576 passive surveillance programs in Thailand, 1994–2010. *BMC Public Health*. 2015;15:  
577 250.

578

579

580

581

582

583 **Table 1. Pre-epidemic DENV-2 neutralizing antibody prevalence among symptomatic and**  
584 **inapparent DENV-2 infections.**

|                                         | <b>Symptomatic</b> | <b>Inapparent</b> | <b>All</b>  |
|-----------------------------------------|--------------------|-------------------|-------------|
| Median age in 2010 (IQR <sup>1</sup> )  | 17 (13-42)         | 27 (16-45)        | 19 (14-43)  |
| DENV-2 antibody prevalence <sup>2</sup> | 43% (26/60)        | 76% (13/17)       | 51% (39/77) |
| <= 15yrs (born 1995 or later)           | 17% (4/24)         | 25% (1/4)         | 18% (5/28)  |
| > 15yrs (born prior to 1995)            | 61% (22/36)        | 92% (12/13)       | 69% (34/49) |
| Geometric mean titer <sup>3</sup>       | 267                | 418               | 310         |

585 <sup>1</sup> IQR indicates interquartile range (i.e., 25<sup>th</sup> and 75<sup>th</sup> percentiles).

586 <sup>2</sup> Numbers in parentheses indicate antibody positive samples and the total number analyzed in  
587 each category.

588 <sup>3</sup> Geometric mean titers are based on samples with detectable titers, and are aggregated across all  
589 pre-infection samples available for individuals.

590

591

592 **Table 2. Pre-epidemic DENV-2 neutralizing antibody profiles of participants with**  
593 **subsequent confirmed DENV-2 infection in 2010-2011.** Seroprevalence is based on a cutoff  
594 titer of 60. Geometric mean titers (GMT) are based on samples with detectable titers.

|                                   | Years prior to infection |                   |                   |                   |
|-----------------------------------|--------------------------|-------------------|-------------------|-------------------|
|                                   | 3 to 2 yrs               | 2 to 1 yrs        | 1 to 0.5 yrs      | ≤ 0.5 yrs         |
| N <sup>1</sup>                    | 54                       | 64                | 60                | 34                |
| Seroprevalence (95%<br>CI)        | 59% (45%-<br>72%)        | 59% (46%-<br>72%) | 58% (45%-<br>71%) | 59% (41%-<br>75%) |
| Geometric mean titer <sup>2</sup> | 320                      | 337               | 263               | 370               |

595 <sup>1</sup> If more than one sample was available for a participant within a particular time interval, only  
596 one sample was used in the calculations.

597 <sup>2</sup> Geometric mean titers are based on samples with detectable titers.

598

599 **Table 3. Neutralization of Am-DENV-2 and AA-DENV-2 test viruses using human serum**  
600 **from longitudinal cohort studies.** Geometric mean titers (GMTs) for the individual test viruses  
601 and the average of the two GMTs are shown.

| Sera, collection years          | American genotype DENV-2 test viruses |         |         | American/Asian genotype DENV-2 test viruses |         |         |
|---------------------------------|---------------------------------------|---------|---------|---------------------------------------------|---------|---------|
|                                 | IQT2124                               | IQT2913 | Average | NFI1159                                     | NFI1166 | Average |
| Pre-epidemic, 2006—2010 (n=21)  | 200                                   | 526     | 363     | 139                                         | 203     | 171     |
| Post-epidemic, 2011—2012 (n=14) | 327                                   | 1150    | 739     | 871                                         | 927     | 899     |

602

603

604 **Figure 1. Age distribution of DENV neutralizing antibodies in 2010.** Samples were collected  
605 between March and June 2010, approximately 6 months prior to a large dengue epidemic largely  
606 caused by American/Asian genotype DENV-2. Top panel: Age distribution of serotype-specific  
607 DENV neutralizing antibodies. Bottom panel: Age distribution of number of prior DENV  
608 infections. Naïve indicates absence of detectable DENV neutralizing antibodies against any  
609 serotype, monotypic indicates DENV neutralizing antibodies against one serotype, and  
610 multitypic indicates DENV neutralizing antibodies against two or more serotypes.

611

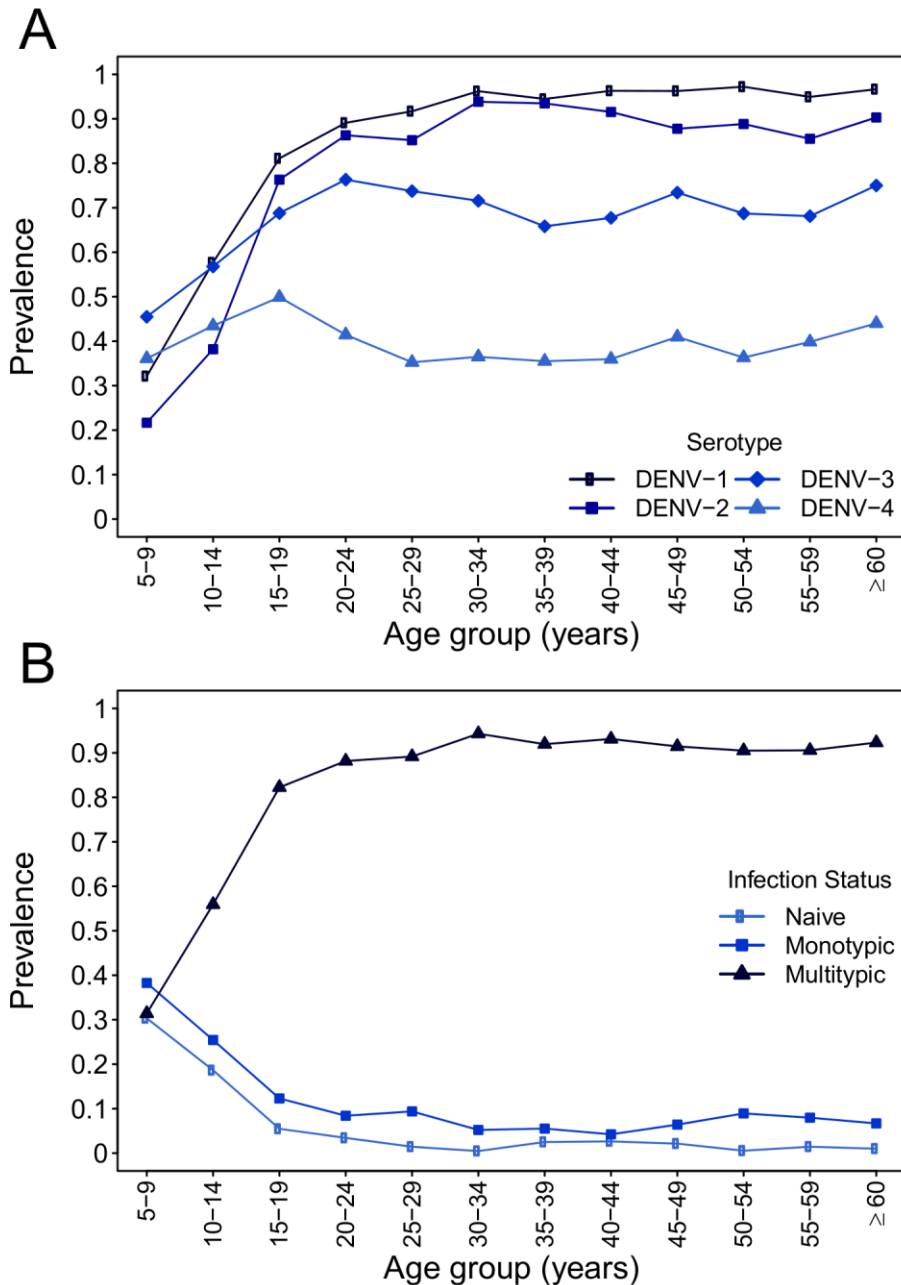

612

613 **Figure 2. Expected versus observed DENV-2 and DENV-4 cases.** The observed age  
614 distribution of cases of DENV-2 (dark green in panels A, C, and D) and DENV-4 (dark purple in  
615 panel B). Using the ages of all febrile individuals that participated in a clinic-based febrile  
616 surveillance study[17], we built an empirical estimate of the age distribution of individuals who  
617 sought treatment in Iquitos. By multiplying this distribution by the age-specific percent of the  
618 population with serotype-specific dengue antibodies, we created serotype-specific expected age  
619 distributions of cases for DENV-2 and DENV-4 (light green in panel A and light purple in panel  
620 B). We then adjusted the age- and serotype-specific immune levels and recalculated expected age  
621 distributions of cases for DENV-2 by assuming, across all ages, either 25% or 50% of those who  
622 should have been immune were still susceptible to DENV-2 (light green in panel C and light  
623 green in panel D, respectively).

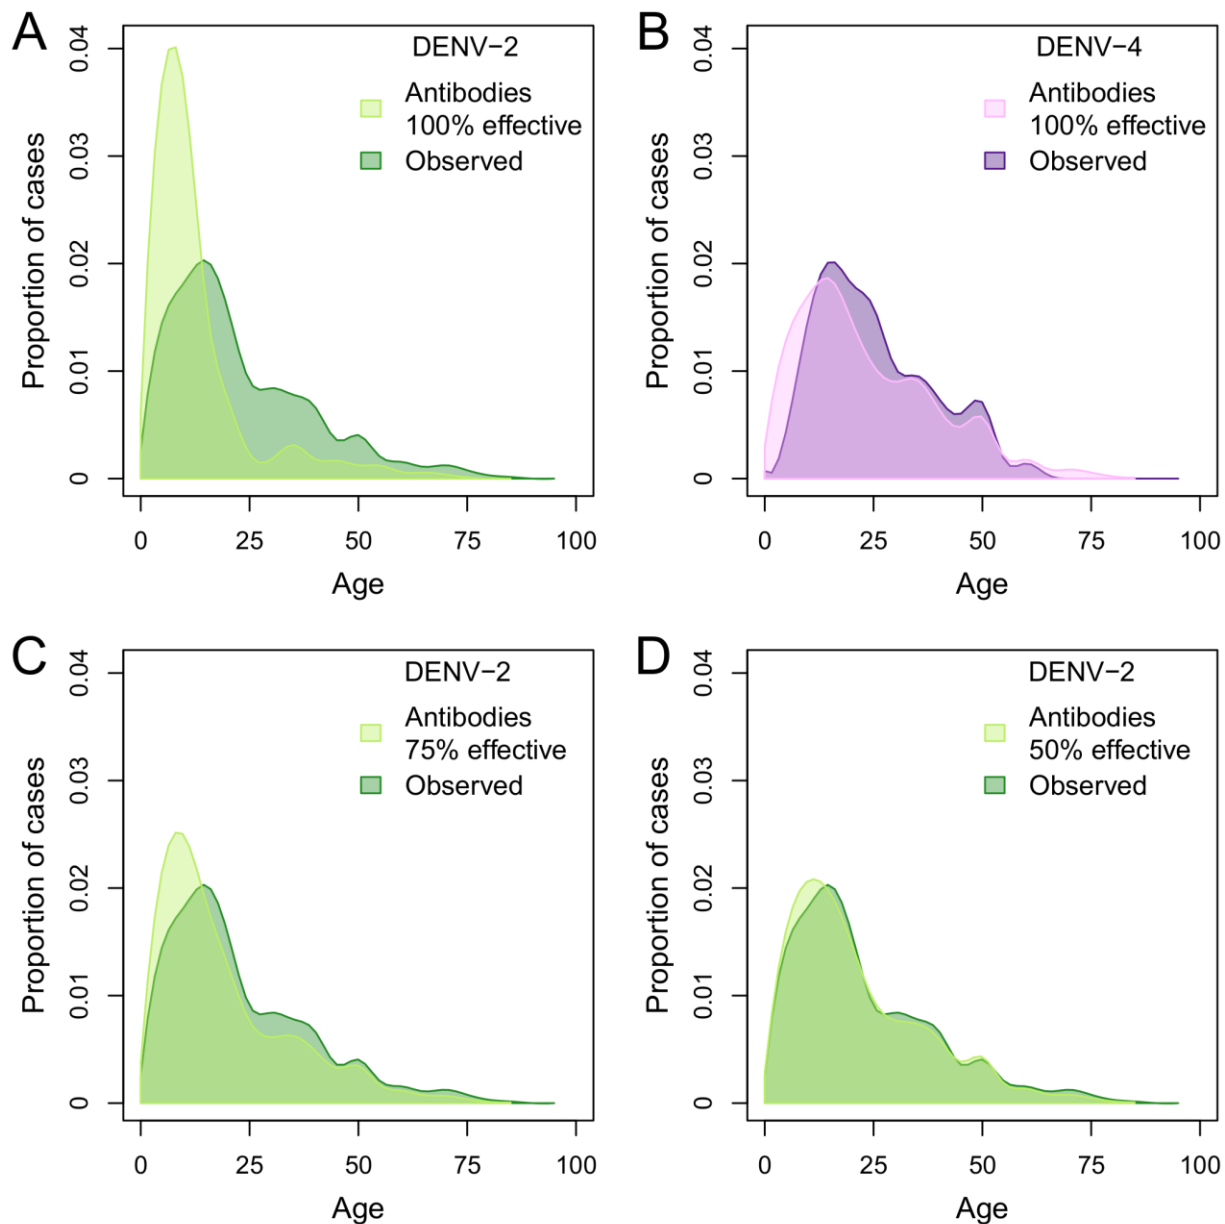

624

625 **Fig. 3. Proportion of active DENV-2-infected and DENV-negative individuals by age group**  
626 **(in 5 year intervals).** Individuals identified through a contract-tracing study provided serum  
627 samples at day 0 and day 15 and were tested for active DENV infection by RT-PCR.  
628 Overlapping age distributions suggest that there were no gross age-dependent differences in risk  
629 for infection within the study population.

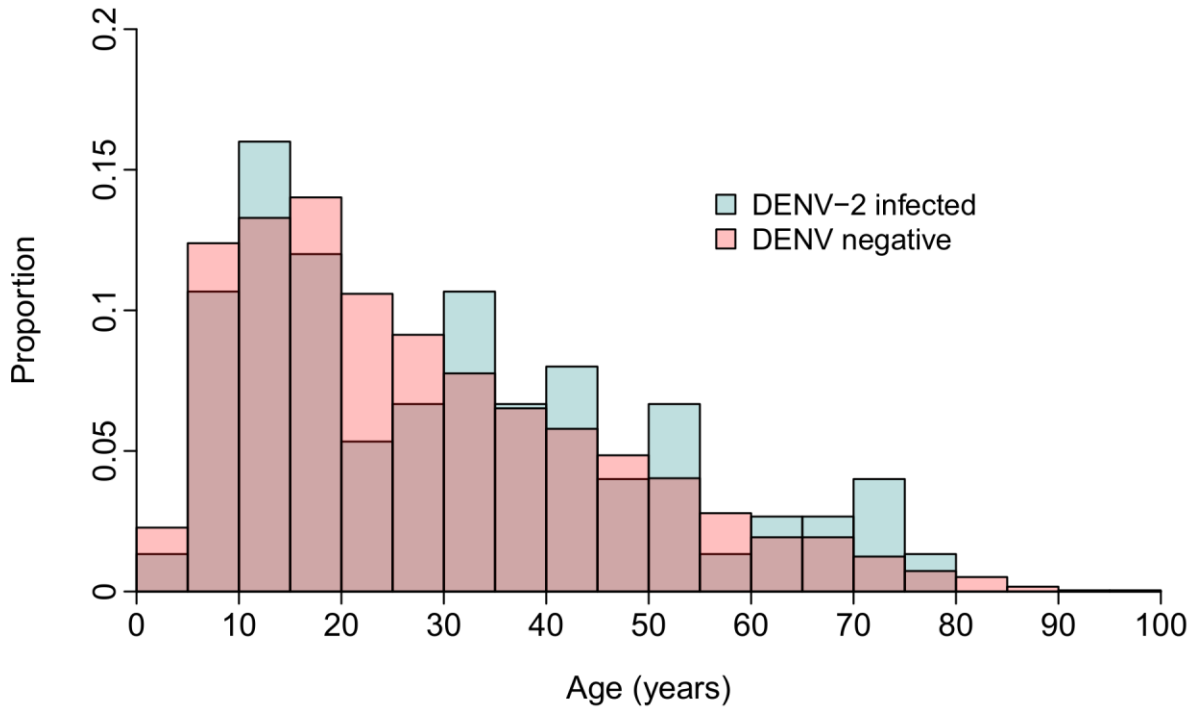

630

631

632 **Figure 4: DENV-1 and DENV-2 neutralizing antibodies by birth cohort.** Samples were  
633 collected from longitudinal cohort studies conducted in Iquitos since 1993. Top panel: DENV-1  
634 neutralizing antibodies. Bottom panel: DENV-2 neutralizing antibodies.

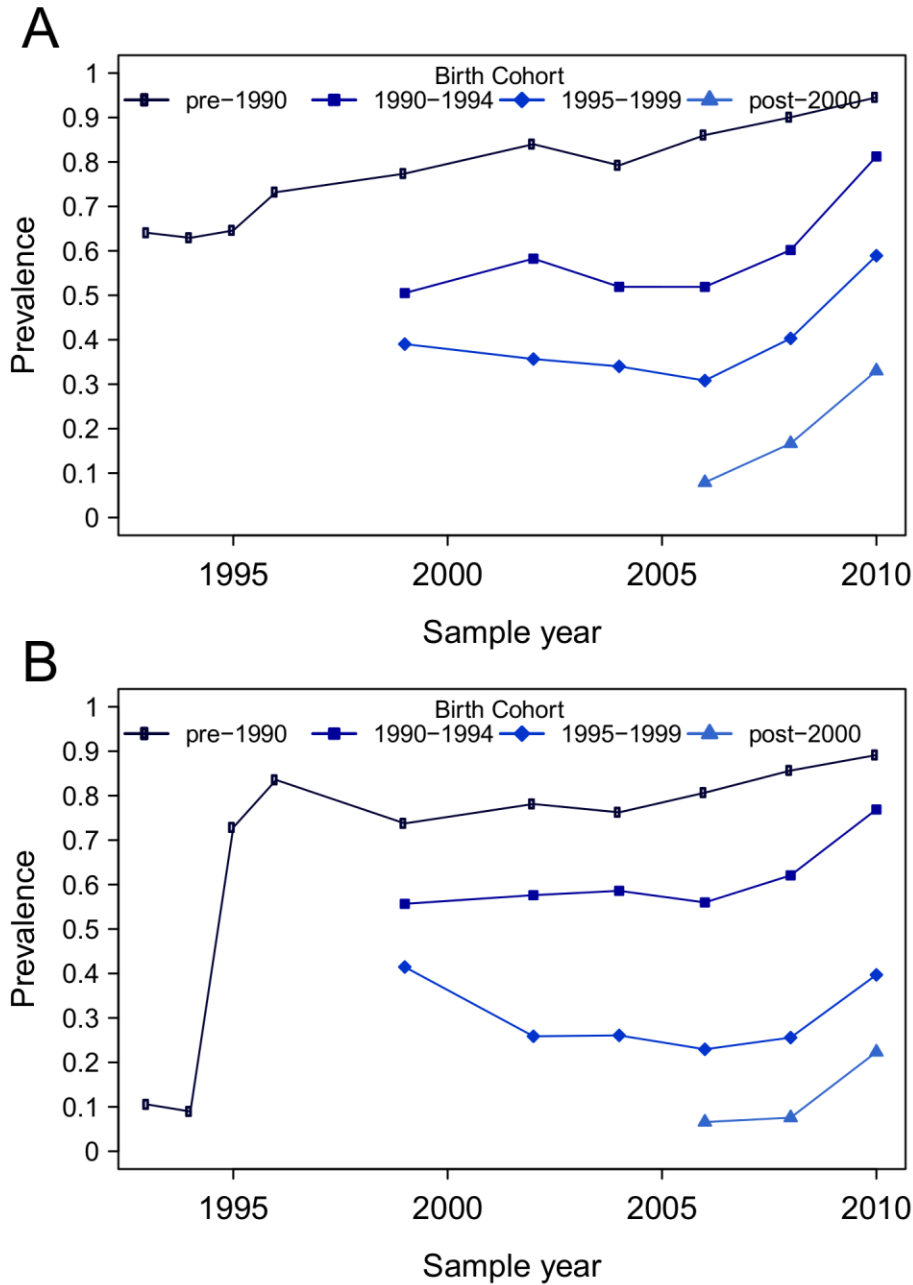

635
